# Supplementary material for: Haplotype Analysis of Chloroplast Genomes for Jujube Breeding
Source: Front Plant Sci. 2022 Mar 10;13:841767. doi: 10.3389/fpls.2022.841767 (PMC8961131; doi:10.3389/fpls.2022.841767)
Supplement: Supplementary file 2 [file Table_2.XLSX]

## Sheet: Sheet1
Table S2. Cultivated and wild jujube accessions selected for re-sequencing analysis , Specific information about data downloaded from the SRA, as provided in the following article (Huang et al., 2016)
No.	Species	Accession	Tree type	Eating type	Weight (g)	Shape	Fruit edible (%)	Percentage of seed	Drying rate of fruit (%)	Sugar content (mg/100 g)	Original sites	Total cleaned resequncing bases	Depth	Coverage	Homozygous SNPs	Heterozygous SNPs
1	Jujube (Ziziphus jujuba)	Linyilizao	arbor	Fresh	31.6	pyriform	96.6	0	— *	22.25	Linyi, Shanxi Province	10485418250	26.93	0.9223	0.106806	0.225939
2		Qiyuexian	arbor	Fresh	29.8	conicalness	97.8	0	—	24.55	Heyang, Shaanxi Province	9673431250	24.96	0.9196	0.117828	0.196672
3		Yongjihamazao	arbor	Fresh	25.4	cylinder	96.3	3.3	—	28.1	Yongji, Shanxi Province	8746870982	22.64	0.9042	0.124372	0.201751
4		Fengmiguan	arbor	Fresh	9.2	globose	94	30	—	25.97	Dali, Shaanxi Province	12509765000	31.72	0.9235	0.129756	0.203808
5		Dongzao	arbor	Fresh	11.9	globose	94.9	86.7	—	33.8	Zhanhua, Shandong Province	14333041000	31.29	0.9255	0.141148	0.226636
6		Lingwuchangzao	arbor	Fresh	19.9	conicalness	95.1	0	—	21.24	Lingwu, Ningxia Autonomous Region	8675982500	22.29	0.9126	0.128636	0.211541
7		Shandonglizao	arbor	Fresh	22.4	pyriform	95.4	86.7	—	22.76	Laoling, Shandong	13049149000	32.22	0.9221	0.131187	0.19295
8		Gagazao	arbor	Fresh	11	ovoid	94	63.3	—	24.5	Beijing	10991975750	28.28	0.9352	0.120029	0.222584
9		Jinzao	arbor	Fresh/Dry	25.7	conicalness	96.2	18.3	45.6	64.67	Bingxian, Shaanxi Province	8229180770	21.38	0.9145	0.120328	0.194283
10		Jinsixiaozao	arbor	Dry	6.5	oblong	96	58.3	59	64.13	Cangzhou, Hebei Province	10675484385	27.61	0.9202	0.127544	0.188328
11		Changhongzao	arbor	Dry	11	oblong	95.9	few	45	78-80	Zaozhuang, Shandong Province	9761283934	24.94	0.9264	0.114959	0.214678
12		Yuanlingzao	arbor	Dry	12.5	globose	97	86.7	61	70.15	Chiping, Shandong Province	11241897500	28.39	0.9238	0.10979	0.210295
13		Huizao	arbor	Dry	12.3	obovate	97.3	4.5	50	59.0-68.7	Xinzheng, Henan Province	11714273250	29.16	0.9272	0.130165	0.21698
14		Bianhesuan	arbor	Dry	10	oblong	94.2	5	56.2	75.84	Neihuang, Henan Province	11100390113	28.26	0.9263	0.122562	0.201367
15		Zhishegedazao	arbor	Dry	13.2	ovoid	93.1	20	45		Pucheng, Shaanxi Province	9331034557	24.24	0.9212	0.13123	0.196119
16		Zhongyangmuzao	arbor	Dry	14.1	oblong	96.8	0	48.6	72	Zhongyang, Shaanxi Province	13626282250	35.29	0.9418	0.111143	0.216511
17		Dunhuangdazao	arbor	Dry	15.6	globose	96.7	0	47	74.7	Dunhuang, Gansu	11093135207	27.98	0.9202	0.121018	0.208735
18		Zhongningxiaoyuanzao	arbor	Dry	14.2	oblate	94.3	13.4	57.8	63.59	Zhonging, Ningxia Autonomous Region	12252004250	30.51	0.9191	0.127389	0.194813
19		Tailihong	arbor	Fresh/Dry	11	cylinder	95.8	96.7	—	—		10492001750	26.65	0.9221	0.132305	0.189289
20		Dayewuhezao	arbor	Fresh	28	oblate	99.2	0	—	24.7	Neihuang, Henan Province	10652827000	27.09	0.9221	0.123589	0.179968
21		Xishuangbannaxiaozao	arbor	Dry	10.4	cylinder	94.6	98.3	—	—	Xishuangbanna, Xinjiang Autonomous Region	11169697250	27.49	0.9141	0.132122	0.191303
22	Semi-wild jujube (Ziziphus jujuba var. spinosa)	Yanchuandasuanzao	semi-arbor	Fresh/seed	7.3	globose	90	96	—	—	Yanchuan, Shaanxi Province	11823138750	30.17	0.9259	0.116761	0.223516
23		Jiaxiantuansuanzao	arbor	Fresh/seed	5.2	globose	91.4	100	—	—	Jiaxian, Shaanxi Province	10118772603	26.03	0.9245	0.124118	0.231353
24		Dayesuanzao	arbor	Fresh/seed	5.1	oblate	88.2	100	—	—	Jiaxian, Shaanxi Province	12600091000	32.13	0.9386	0.130735	0.248011
25		Taigusuanzao	bush	seed	6.5	oblong	86	100	—	—	Taigu, Shanxi Province	9954321750	25.91	0.9356	0.127209	0.249354
26	Wild jujube (Ziziphus jujuba var. spinosa)	Tiansuanzao	bush	seed	2.5	globose	86	100	—	—	Jiaxian, Shaanxi Province	14077404000	35.58	0.94	0.139081	0.246239
27		Xinjiangxiaoyuanzao	semi-arbor	seed	3.7	globose	87.8	100	—	—	Alaer, Xinjiang Autonomous Region	10485820250	25.36	0.9121	0.146252	0.211149
28		Xianxiansuanzao	semi-arbor	Fresh	2.1	globose	86.7	15	—	—	Xianxian, Hebei	11492930750	29.73	0.9359	0.134756	0.23872
29		Qingjiansuanzao	bush	seed	1.5	globose	84	100	—	—	Qingjian, Shaanxi Province	12257492537	31.64	0.9189	0.157819	0.205545
30		Xingtaisuanzao No.5	bush	seed	1.5	globose	85	95	—	—	Xingtai, Hebei	12362615750	31.87	0.9341	0.157689	0.238234
31		Xingtaisuanzao No.11	bush	Seed	2.9	globose	88	95	—	—	Xingtai, Hebei	9128864000	23.97	0.9273	0.161688	0.234992
* the drying rate was not detemined for fresh cultivars
